# Supplementary material for: Symptom distress and interference among cancer patients with osteoradionecrosis of jaw: A cross-sectional study
Source: PubMed Central journal article supplement — Int J Nurs Sci. 2019 Jun 3;6(3):278–82. doi: 10.1016/j.ijnss.2019.05.006 (PMC6722474; doi:10.1016/j.ijnss.2019.05.006), 2019-06-03
Supplement: mmc1.pdf [file mmc1.pdf]

# 放射性颌骨坏死患者症状困扰的调查研究

杨冬叶, 周凤, 符馨予, 侯劲松, 林丽婷, 黄秋雨, 叶昭幸

## 【摘要】

**目的** 研究放射性颌骨坏死 (osteoradionecrosis of jaws, ORNJ) 患者的症状严重程度以及症状干扰患者生活的程度。

**方法** 采用中文版 MD Anderson 症状调查量表-头颈部(The M. D. Anderson Symptom Inventory-Head and Neck Module, MDASI-HN)及自行设计的增补条目对 95 例 ORNJ 住院患者进行问卷调查。

**结果** ORNJ 患者症状困扰的发生率为 97.9%，症状对生活的妨碍的发生率为 85.2%；症状严重程度由高到低排前 10 名的条目分别是：张口困难、牙齿/牙龈问题、咀嚼或吞咽困难、口干、口腔异味、发音或讲话困难、口腔溃疡、耳鸣/耳阻塞感、皮肤疼痛/灼烧感/皮炎、听力下降。发病时距放疗后时间间隔越长，ORNJ 患者的张口困难愈加严重，且张口度与症状困扰呈负相关 ( $r = -0.298$ ,  $P = 0.003$ )。发病时距放疗后时间间隔与症状困扰呈正相关 ( $r = 0.479$ ,  $P < 0.01$ )；症状困扰对生活的妨碍程度与核心症状、头颈部症状、ORNJ 症状等呈正相关 ( $P < 0.01$ )。

**结论** ORNJ 患者的症状困扰以张口困难等颌面部不适症状为主，普遍存在症状困扰，并对生活造成较大妨碍。发病时距放疗的时间间隔越长，患者张口困难症状越严重。

**【关键词】** 头颈部肿瘤；护理；体征和症状；放射性颌骨坏死

通信作者：杨冬叶，E-mail: dongye-yangs@163.com
